# Supplementary material
Source: Springer Nature journal article supplement (https://www.springermedizin.de/resource/supplementary/13054_2013_3040_MOESM7_ESM.pdf/9712454)

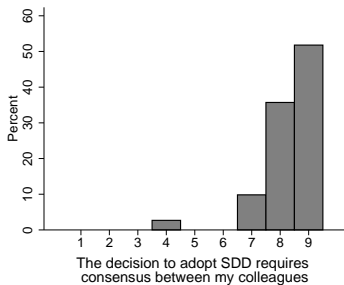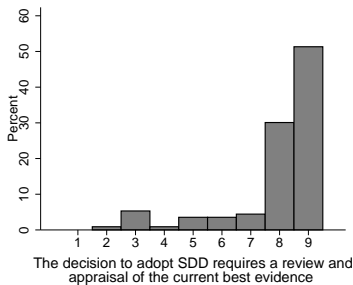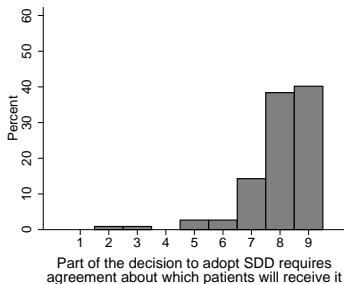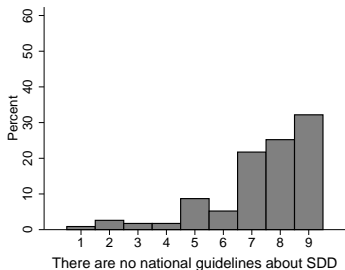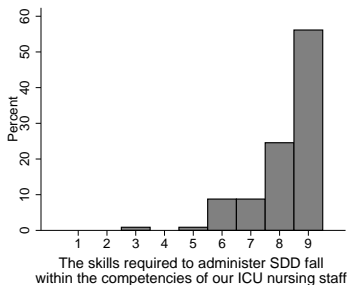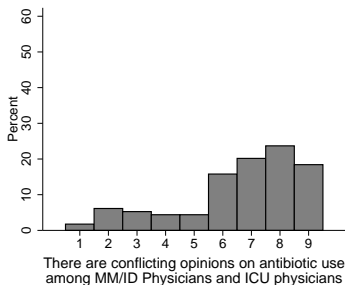

Supplement: MOESM7 [file 9712454]
